# Supplementary material for: Reduction of double manganese–cobalt oxides: in situ XRD and TPR study
Source: Royal Society of Chemistry journal article supplement (doi:10.1039/c8dt04137g), 2018-01-01
Supplement: c8dt04137g1.pdf [file c8dt04137g1.pdf]

### Electronic supplementary information

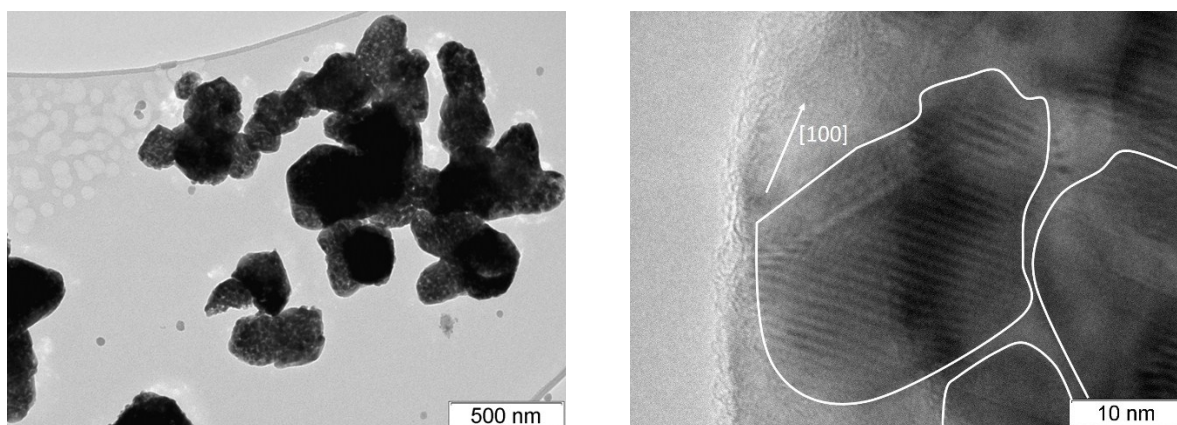

**Fig. S1** TEM images for mixed Mn-Co oxides reduced at 500 °C.

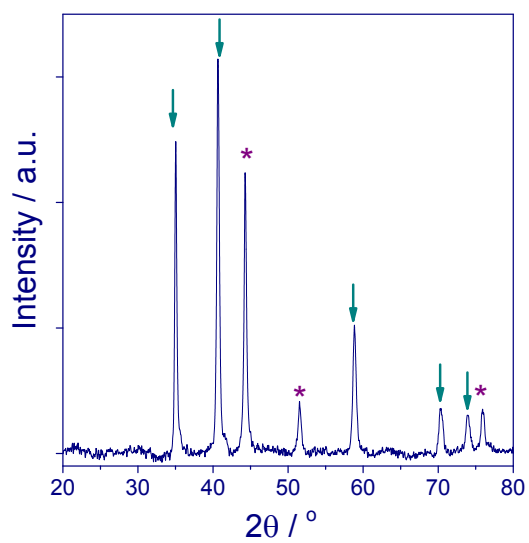

**Fig. S2** XRD pattern of sample at RT after reduction at 600°C. Arrows indicate position of MnO, asterisks - Co.
